# Supplementary material for: Biophysical and computational analyses of interaction of 2D MoS2 nanosheets with human haemoglobin coupled with NIR activated photothermal therapy
Source: Royal Society of Chemistry journal article supplement (doi:10.1039/d4nj01535e), 2024-01-01
Supplement: d4nj01535e1.pdf [file d4nj01535e1.pdf]

## *Supporting Information (SI)*

# **Biophysical and computational analysis of interaction 2D MoS<sub>2</sub> nanosheets with human haemoglobin coupled with NIR activated photothermal therapy**

**Kritika<sup>a,b</sup>, Deepika<sup>a</sup>, Loveneesh Kumar<sup>c</sup>, Monika Yadav<sup>d</sup>, Anita Kamra Verma<sup>d,e</sup> and Indrajit Roy<sup>a\*</sup>**

Authors Affiliations

<sup>a</sup>Department of Chemistry, University of Delhi, Delhi-110007, India.

<sup>b</sup>Institute of Translation Medicine, School of Chemical Engineering, University of Birmingham, Edgbaston, Birmingham B15 2TT, United Kingdom.

<sup>c</sup>Center for Environmentally Beneficial Catalysis, University of Kansas, Lawrence, Kansas 66047, United States.

<sup>d</sup>Department of Zoology, University of Delhi, Delhi-110007, India.

<sup>e</sup>Fellow, Delhi School of Public Health, Institution of Eminence, University of Delhi, Delhi-110007, India.

## **Correspondence**

\*Prof. Indrajit Roy

Department of Chemistry

University of Delhi,

Delhi-110007. India.

Email: [indrajitroy11@gmail.com](mailto:indrajitroy11@gmail.com)

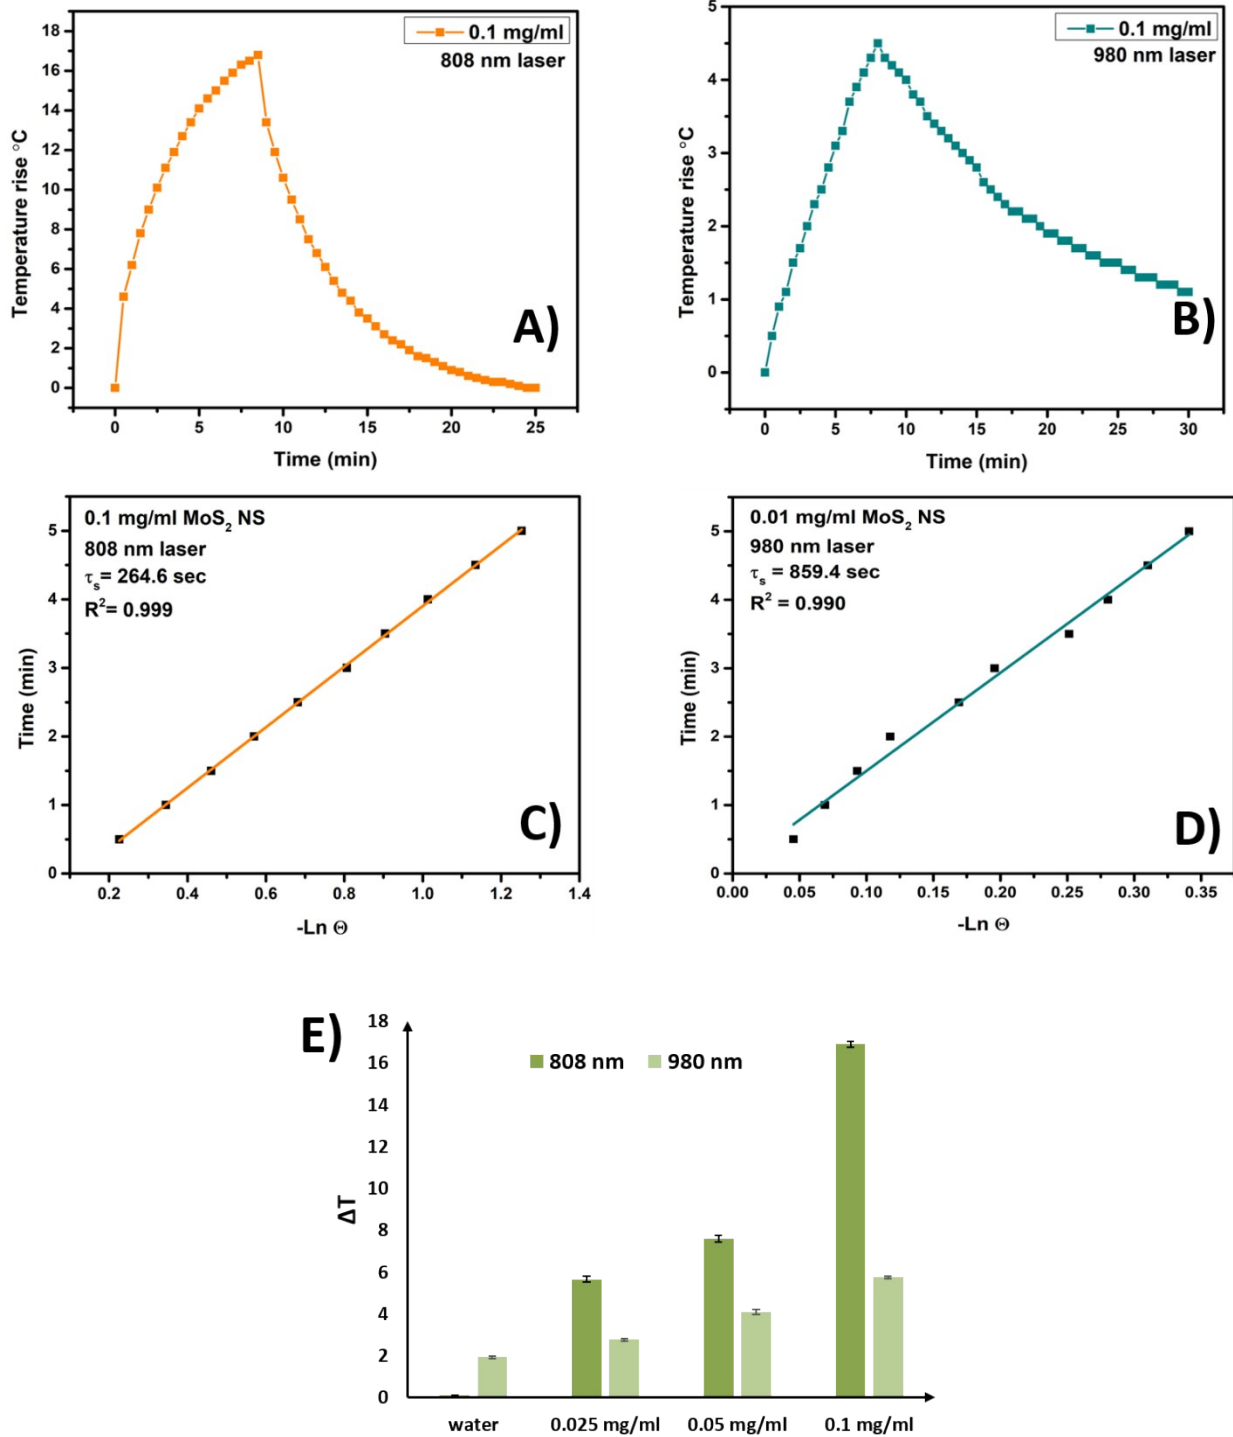

**Figure S1 A, B)** Photothermal conversion efficiency of MoS<sub>2</sub> NS using 808 nm (1.2 W) and 980 nm (0.2 W) laser. **C, D)** Calculation of heat dissipation constant using negative logarithm plot of  $-\ln \Theta$  vs Time (min). **E)** Plot of MoS<sub>2</sub> Concentration (mg/ml) and water vs change in temperature (°C) using 808 nm (1.2 W) and 980 nm laser (0.2 W).

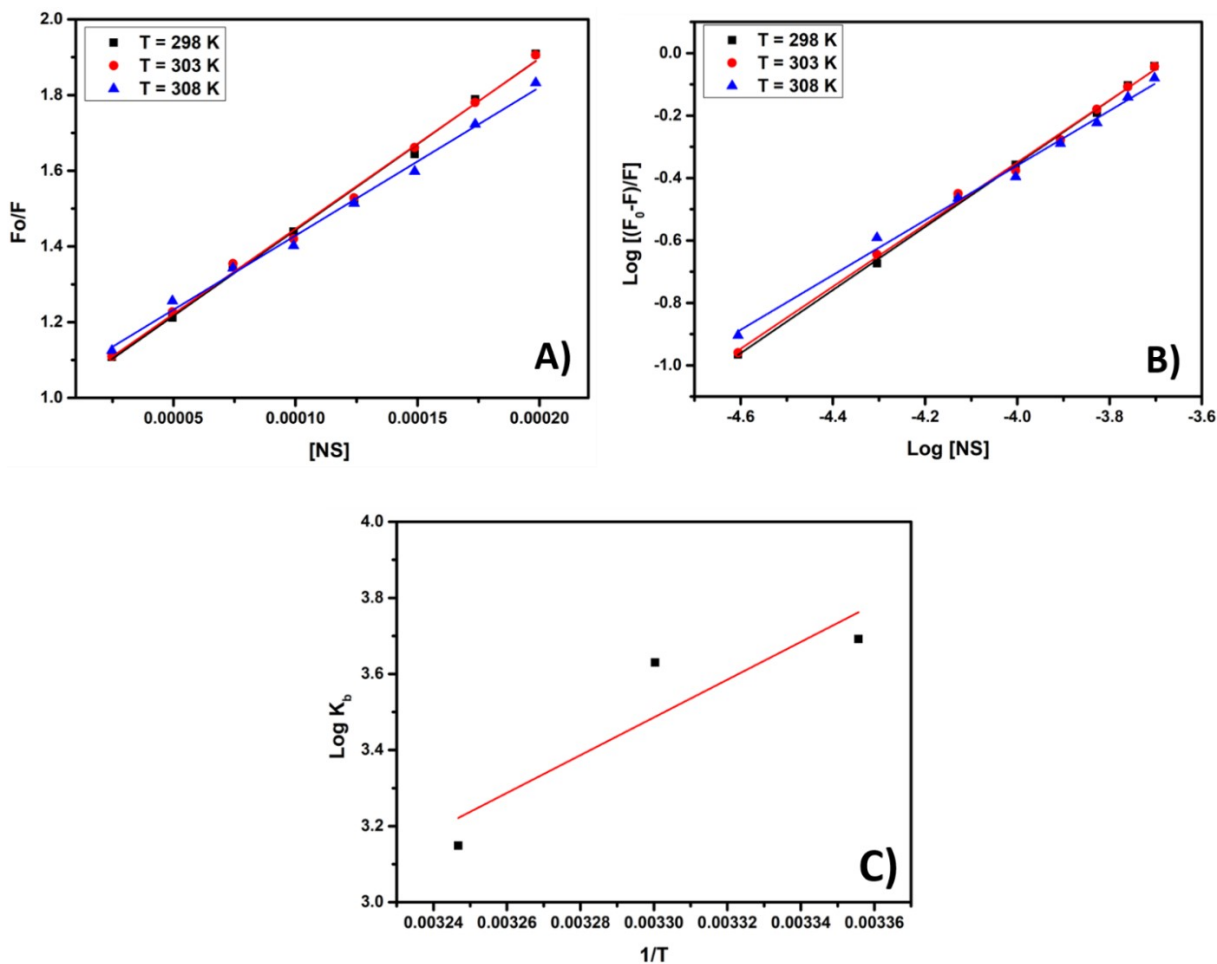

**Figure S2** A) Stern Volmer Plot of 2.5  $\mu\text{M}$  solution of Hb against the concentration of MoS<sub>2</sub> NS at 298, 303 and 308 K. B) Modified Stern Volmer plot of NS-Hb interaction for calculating binding constant. C)  $\text{Log } K_b$  vs  $1/T$  (Van't Hoff Plot) for calculating thermodynamic parameters.

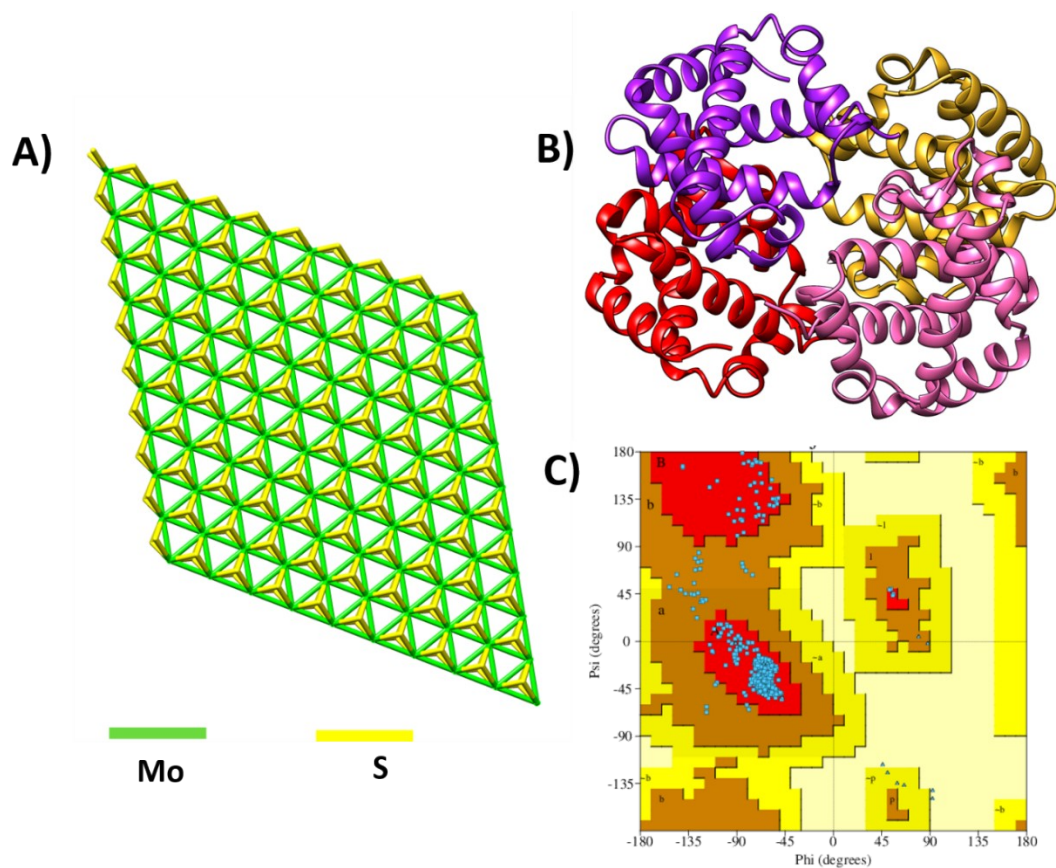

**Figure S3** A) 2D structure of MoS<sub>2</sub> NS. B) 3D structure of haemoglobin. C) Ramachandran plot for 3D structure of haemoglobin.

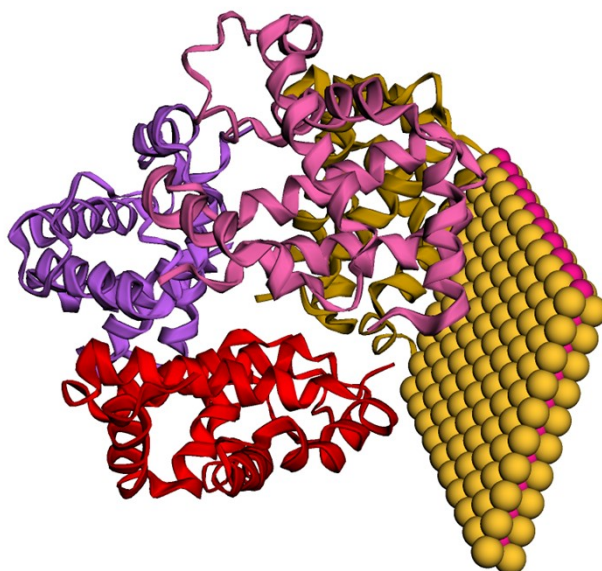

**Figure S4** Surface view interaction of MoS<sub>2</sub> NS with human haemoglobin via molecular docking analysis.

**Table S1: Binding constants for interaction of Hb with MoS<sub>2</sub> NS at 298 K, 303 K and 308 K.**

| Binding Constants                                          | Temperature (K) |         |         |
|------------------------------------------------------------|-----------------|---------|---------|
|                                                            | 298 K           | 303 K   | 308 K   |
| Stern Volmer Constant $K_{sv}$ ( $M^{-1}$ )( $10^3$ )      | 4.537           | 4.497   | 3.918   |
| Quenching Constant $K_q$ ( $M^{-1} s^{-1}$ ) ( $10^{11}$ ) | 4.537           | 4.497   | 3.918   |
| Binding Constant $K_b$ ( $M^{-1}$ )                        | 4897.78         | 4265.79 | 1380.38 |
| Number of binding sites n                                  | 1.011           | 0.995   | 0.999   |

**Table S2: Thermodynamic parameters of interaction of Hb with MoS<sub>2</sub> NS.**

|                     | $\Delta G$ (kJ/mol) | $\Delta H$ (kJ/mol) | $T\Delta S$ (kJ/mol) |
|---------------------|---------------------|---------------------|----------------------|
| MoS <sub>2</sub> NS | -9.3211             | -41.2562            | -31.9351             |

**Table S3: Percentage content of secondary structure of protein for Hb only and Hb with MoS<sub>2</sub> NS**

| Secondary structures | Details of secondary structures | Percentage content of secondary structure |                                         |                                         |                                         |
|----------------------|---------------------------------|-------------------------------------------|-----------------------------------------|-----------------------------------------|-----------------------------------------|
|                      |                                 | Hb                                        | Hb+ MoS <sub>2</sub> NS (0.00304 mg/ml) | Hb+ MoS <sub>2</sub> NS (0.00608 mg/ml) | Hb+ MoS <sub>2</sub> NS (0.01216 mg/ml) |
| <b>Helix</b>         | Helix 1 (Regular)               | 21.0                                      | 19.7                                    | 18.9                                    | 17.3                                    |
|                      | Helix 2 (Distorted)             | 11.4                                      | 11.3                                    | 10.6                                    | 10.6                                    |
| <b>Antiparallel</b>  | Anti 1 (Left-twisted)           | 0.0                                       | 0.0                                     | 0.0                                     | 0.0                                     |
|                      | Anti 2 (Relaxed)                | 0.0                                       | 0.0                                     | 1.8                                     | 0.4                                     |
|                      | Anti 3 (Right twisted)          | 13.0                                      | 12.7                                    | 12.8                                    | 13.9                                    |
| <b>Parallel</b>      |                                 | 7.4                                       | 8.1                                     | 9.4                                     | 7.6                                     |
| <b>Turns</b>         |                                 | 17.4                                      | 17.2                                    | 16.1                                    | 17.9                                    |
| <b>Others</b>        |                                 | 29.7                                      | 31.0                                    | 30.4                                    | 32.3                                    |

**Table S4: The detailed molecular interactions were evaluated using PDBsum**

**List of protein-ligand interactions**

**Hydrogen bonds**

-----

| <----- A T O M 1 -----> |           |          |         |       |     | <----- A T O M 2 -----> |           |          |         |       |          |
|-------------------------|-----------|----------|---------|-------|-----|-------------------------|-----------|----------|---------|-------|----------|
| Atom no.                | Atom name | Res name | Res no. | Chain |     | Atom no.                | Atom name | Res name | Res no. | Chain | Distance |
| 1.                      | 2152      | OD1      | ASP 94  | B     | <-- | 5297                    | S1        | LIG 0    | Z       |       | 3.01     |
| 2.                      | 2152      | OD1      | ASP 94  | B     | <-- | 5343                    | S29       | LIG 0    | Z       |       | 3.19     |
| 3.                      | 2847      | OE2      | GLU 23  | C     | <-- | 5314                    | S9        | LIG 0    | Z       |       | 1.93     |

|     |      |     |     |     |   |     |      |     |     |   |   |      |
|-----|------|-----|-----|-----|---|-----|------|-----|-----|---|---|------|
| 4.  | 2847 | OE2 | GLU | 23  | C | <-- | 5315 | S10 | LIG | 0 | Z | 2.18 |
| 5.  | 2847 | OE2 | GLU | 23  | C | <-- | 5323 | S18 | LIG | 0 | Z | 2.93 |
| 6.  | 2847 | OE2 | GLU | 23  | C | <-- | 5324 | S19 | LIG | 0 | Z | 3.10 |
| 7.  | 2881 | OE1 | GLU | 27  | C | <-- | 5323 | S18 | LIG | 0 | Z | 2.06 |
| 8.  | 2902 | O   | GLU | 30  | C | <-- | 5319 | S14 | LIG | 0 | Z | 3.14 |
| 9.  | 2906 | OE1 | GLU | 30  | C | <-- | 5312 | S7  | LIG | 0 | Z | 3.15 |
| 10. | 2906 | OE1 | GLU | 30  | C | <-- | 5321 | S16 | LIG | 0 | Z | 2.47 |
| 11. | 2906 | OE1 | GLU | 30  | C | <-- | 5478 | S83 | LIG | 0 | Z | 2.52 |
| 12. | 2907 | OE2 | GLU | 30  | C | <-- | 5469 | S74 | LIG | 0 | Z | 1.88 |
| 13. | 2907 | OE2 | GLU | 30  | C | <-- | 5478 | S83 | LIG | 0 | Z | 2.55 |
| 14. | 3009 | NZ  | LYS | 40  | C | --> | 5316 | S11 | LIG | 0 | Z | 2.85 |
| 15. | 3009 | NZ  | LYS | 40  | C | --> | 5317 | S12 | LIG | 0 | Z | 1.93 |
| 16. | 3092 | O   | LEU | 48  | C | <-- | 5310 | S5  | LIG | 0 | Z | 1.85 |
| 17. | 3092 | O   | LEU | 48  | C | <-- | 5460 | S65 | LIG | 0 | Z | 3.11 |
| 18. | 3106 | N   | HIS | 50  | C | --> | 5460 | S65 | LIG | 0 | Z | 2.96 |
| 19. | 3112 | ND1 | HIS | 50  | C | --> | 5469 | S74 | LIG | 0 | Z | 2.82 |
| 20. | 3672 | NE2 | HIS | 112 | C | --> | 5323 | S18 | LIG | 0 | Z | 2.15 |

### Non-bonded contacts

-----

<----- A T O M 1 ----->

<----- A T O M 2 ----->

|    | Atom | Atom | Res  | Res |       | Atom | Atom | Res  | Res |       |          |  |
|----|------|------|------|-----|-------|------|------|------|-----|-------|----------|--|
|    | no.  | name | name | no. | Chain | no.  | name | name | no. | Chain | Distance |  |
| 1. | 2151 | CG   | ASP  | 94  | B     | 5343 | S29  | LIG  | 0   | Z     | 3.64     |  |
| 2. | 2152 | OD1  | ASP  | 94  | B     | 5297 | S1   | LIG  | 0   | Z     | 3.01     |  |

|     |      |     |     |     |   |     |      |      |     |   |   |      |
|-----|------|-----|-----|-----|---|-----|------|------|-----|---|---|------|
| 3.  | 2152 | OD1 | ASP | 94  | B | --- | 5343 | S29  | LIG | 0 | Z | 3.19 |
| 4.  | 2153 | OD2 | ASP | 94  | B | --- | 5343 | S29  | LIG | 0 | Z | 3.58 |
| 5.  | 2637 | O   | HIS | 146 | B | --- | 5316 | S11  | LIG | 0 | Z | 3.63 |
| 6.  | 2639 | CG  | HIS | 146 | B | --- | 5494 | S99  | LIG | 0 | Z | 3.46 |
| 7.  | 2640 | ND1 | HIS | 146 | B | --- | 5297 | S1   | LIG | 0 | Z | 3.60 |
| 8.  | 2640 | ND1 | HIS | 146 | B | --- | 5325 | Mo10 | LIG | 0 | Z | 3.83 |
| 9.  | 2640 | ND1 | HIS | 146 | B | --- | 5343 | S29  | LIG | 0 | Z | 3.28 |
| 10. | 2640 | ND1 | HIS | 146 | B | --- | 5494 | S99  | LIG | 0 | Z | 2.08 |
| 11. | 2640 | ND1 | HIS | 146 | B | --- | 5494 | S99  | LIG | 0 | Z | 3.51 |
| 12. | 2641 | CD2 | HIS | 146 | B | --- | 5297 | S1   | LIG | 0 | Z | 3.87 |
| 13. | 2641 | CD2 | HIS | 146 | B | --- | 5343 | S29  | LIG | 0 | Z | 3.47 |
| 14. | 2642 | CE1 | HIS | 146 | B | --- | 5297 | S1   | LIG | 0 | Z | 2.61 |
| 15. | 2642 | CE1 | HIS | 146 | B | --- | 5325 | Mo10 | LIG | 0 | Z | 2.79 |
| 16. | 2642 | CE1 | HIS | 146 | B | --- | 5343 | S29  | LIG | 0 | Z | 2.10 |
| 17. | 2642 | CE1 | HIS | 146 | B | --- | 5353 | Mo20 | LIG | 0 | Z | 3.88 |
| 18. | 2642 | CE1 | HIS | 146 | B | --- | 5494 | S99  | LIG | 0 | Z | 1.97 |
| 19. | 2642 | CE1 | HIS | 146 | B | --- | 5494 | S99  | LIG | 0 | Z | 3.42 |
| 20. | 2643 | NE2 | HIS | 146 | B | --- | 5297 | S1   | LIG | 0 | Z | 2.79 |
| 21. | 2643 | NE2 | HIS | 146 | B | --- | 5325 | Mo10 | LIG | 0 | Z | 3.59 |
| 22. | 2643 | NE2 | HIS | 146 | B | --- | 5343 | S29  | LIG | 0 | Z | 2.24 |
| 23. | 2643 | NE2 | HIS | 146 | B | --- | 5494 | S99  | LIG | 0 | Z | 3.29 |
| 24. | 2644 | OXT | HIS | 146 | B | --- | 5494 | S99  | LIG | 0 | Z | 3.79 |
| 25. | 2822 | ND1 | HIS | 20  | C | --- | 5306 | Mo9  | LIG | 0 | Z | 3.22 |
| 26. | 2824 | CE1 | HIS | 20  | C | --- | 5306 | Mo9  | LIG | 0 | Z | 3.17 |
| 27. | 2841 | C   | GLU | 23  | C | --- | 5304 | Mo7  | LIG | 0 | Z | 3.87 |
| 28. | 2842 | O   | GLU | 23  | C | --- | 5303 | Mo6  | LIG | 0 | Z | 3.80 |



|     |      |     |     |    |   |     |      |      |     |   |   |      |
|-----|------|-----|-----|----|---|-----|------|------|-----|---|---|------|
| 29. | 2842 | O   | GLU | 23 | C | --- | 5304 | Mo7  | LIG | 0 | Z | 3.23 |
| 30. | 2844 | CG  | GLU | 23 | C | --- | 5304 | Mo7  | LIG | 0 | Z | 2.88 |
| 31. | 2844 | CG  | GLU | 23 | C | --- | 5305 | Mo8  | LIG | 0 | Z | 2.91 |
| 32. | 2844 | CG  | GLU | 23 | C | --- | 5314 | S9   | LIG | 0 | Z | 2.63 |
| 33. | 2845 | CD  | GLU | 23 | C | --- | 5304 | Mo7  | LIG | 0 | Z | 3.49 |
| 34. | 2845 | CD  | GLU | 23 | C | --- | 5305 | Mo8  | LIG | 0 | Z | 1.90 |
| 35. | 2845 | CD  | GLU | 23 | C | --- | 5314 | S9   | LIG | 0 | Z | 2.39 |
| 36. | 2845 | CD  | GLU | 23 | C | --- | 5315 | S10  | LIG | 0 | Z | 2.71 |
| 37. | 2846 | OE1 | GLU | 23 | C | --- | 5305 | Mo8  | LIG | 0 | Z | 2.80 |
| 38. | 2846 | OE1 | GLU | 23 | C | --- | 5306 | Mo9  | LIG | 0 | Z | 3.69 |
| 39. | 2846 | OE1 | GLU | 23 | C | --- | 5314 | S9   | LIG | 0 | Z | 3.41 |
| 40. | 2846 | OE1 | GLU | 23 | C | --- | 5315 | S10  | LIG | 0 | Z | 2.68 |
| 41. | 2847 | OE2 | GLU | 23 | C | --- | 5304 | Mo7  | LIG | 0 | Z | 3.13 |
| 42. | 2847 | OE2 | GLU | 23 | C | --- | 5305 | Mo8  | LIG | 0 | Z | 0.80 |
| 43. | 2847 | OE2 | GLU | 23 | C | --- | 5306 | Mo9  | LIG | 0 | Z | 3.44 |
| 44. | 2847 | OE2 | GLU | 23 | C | --- | 5314 | S9   | LIG | 0 | Z | 1.93 |
| 45. | 2847 | OE2 | GLU | 23 | C | --- | 5315 | S10  | LIG | 0 | Z | 2.18 |
| 46. | 2847 | OE2 | GLU | 23 | C | --- | 5323 | S18  | LIG | 0 | Z | 2.93 |
| 47. | 2847 | OE2 | GLU | 23 | C | --- | 5324 | S19  | LIG | 0 | Z | 3.10 |
| 48. | 2847 | OE2 | GLU | 23 | C | --- | 5415 | Mo82 | LIG | 0 | Z | 3.30 |
| 49. | 2847 | OE2 | GLU | 23 | C | --- | 5424 | Mo91 | LIG | 0 | Z | 3.45 |
| 50. | 2847 | OE2 | GLU | 23 | C | --- | 5494 | S99  | LIG | 0 | Z | 3.88 |
| 51. | 2855 | CD1 | TYR | 24 | C | --- | 5305 | Mo8  | LIG | 0 | Z | 3.63 |
| 52. | 2857 | CE1 | TYR | 24 | C | --- | 5305 | Mo8  | LIG | 0 | Z | 3.22 |
| 53. | 2857 | CE1 | TYR | 24 | C | --- | 5306 | Mo9  | LIG | 0 | Z | 3.79 |
| 54. | 2857 | CE1 | TYR | 24 | C | --- | 5324 | S19  | LIG | 0 | Z | 3.54 |

|     |      |     |     |    |   |     |      |     |     |   |   |      |
|-----|------|-----|-----|----|---|-----|------|-----|-----|---|---|------|
| 55. | 2860 | OH  | TYR | 24 | C | --- | 5306 | Mo9 | LIG | 0 | Z | 3.43 |
| 56. | 2860 | OH  | TYR | 24 | C | --- | 5324 | S19 | LIG | 0 | Z | 3.82 |
| 57. | 2870 | C   | ALA | 26 | C | --- | 5302 | Mo5 | LIG | 0 | Z | 3.62 |
| 58. | 2870 | C   | ALA | 26 | C | --- | 5303 | Mo6 | LIG | 0 | Z | 3.63 |
| 59. | 2871 | O   | ALA | 26 | C | --- | 5302 | Mo5 | LIG | 0 | Z | 2.94 |
| 60. | 2874 | N   | GLU | 27 | C | --- | 5303 | Mo6 | LIG | 0 | Z | 2.90 |
| 61. | 2874 | N   | GLU | 27 | C | --- | 5321 | S16 | LIG | 0 | Z | 3.79 |
| 62. | 2875 | CA  | GLU | 27 | C | --- | 5302 | Mo5 | LIG | 0 | Z | 3.61 |
| 63. | 2875 | CA  | GLU | 27 | C | --- | 5303 | Mo6 | LIG | 0 | Z | 2.58 |
| 64. | 2875 | CA  | GLU | 27 | C | --- | 5321 | S16 | LIG | 0 | Z | 2.70 |
| 65. | 2875 | CA  | GLU | 27 | C | --- | 5322 | S17 | LIG | 0 | Z | 3.33 |
| 66. | 2876 | C   | GLU | 27 | C | --- | 5321 | S16 | LIG | 0 | Z | 3.40 |
| 67. | 2877 | O   | GLU | 27 | C | --- | 5321 | S16 | LIG | 0 | Z | 3.23 |
| 68. | 2878 | CB  | GLU | 27 | C | --- | 5303 | Mo6 | LIG | 0 | Z | 2.61 |
| 69. | 2878 | CB  | GLU | 27 | C | --- | 5304 | Mo7 | LIG | 0 | Z | 3.43 |
| 70. | 2878 | CB  | GLU | 27 | C | --- | 5321 | S16 | LIG | 0 | Z | 3.18 |
| 71. | 2878 | CB  | GLU | 27 | C | --- | 5322 | S17 | LIG | 0 | Z | 2.20 |
| 72. | 2879 | CG  | GLU | 27 | C | --- | 5303 | Mo6 | LIG | 0 | Z | 3.36 |
| 73. | 2879 | CG  | GLU | 27 | C | --- | 5321 | S16 | LIG | 0 | Z | 3.11 |
| 74. | 2879 | CG  | GLU | 27 | C | --- | 5322 | S17 | LIG | 0 | Z | 1.98 |
| 75. | 2880 | CD  | GLU | 27 | C | --- | 5304 | Mo7 | LIG | 0 | Z | 3.76 |
| 76. | 2880 | CD  | GLU | 27 | C | --- | 5322 | S17 | LIG | 0 | Z | 2.22 |
| 77. | 2880 | CD  | GLU | 27 | C | --- | 5323 | S18 | LIG | 0 | Z | 3.23 |
| 78. | 2880 | CD  | GLU | 27 | C | --- | 5494 | S99 | LIG | 0 | Z | 3.88 |
| 79. | 2881 | OE1 | GLU | 27 | C | --- | 5304 | Mo7 | LIG | 0 | Z | 2.75 |
| 80. | 2881 | OE1 | GLU | 27 | C | --- | 5322 | S17 | LIG | 0 | Z | 2.05 |

|      |      |     |     |    |   |     |      |      |     |   |   |      |
|------|------|-----|-----|----|---|-----|------|------|-----|---|---|------|
| 81.  | 2881 | OE1 | GLU | 27 | C | --- | 5323 | S18  | LIG | 0 | Z | 2.06 |
| 82.  | 2881 | OE1 | GLU | 27 | C | --- | 5494 | S99  | LIG | 0 | Z | 3.53 |
| 83.  | 2882 | OE2 | GLU | 27 | C | --- | 5322 | S17  | LIG | 0 | Z | 3.34 |
| 84.  | 2899 | N   | GLU | 30 | C | --- | 5301 | Mo4  | LIG | 0 | Z | 3.55 |
| 85.  | 2899 | N   | GLU | 30 | C | --- | 5302 | Mo5  | LIG | 0 | Z | 3.79 |
| 86.  | 2899 | N   | GLU | 30 | C | --- | 5320 | S15  | LIG | 0 | Z | 3.17 |
| 87.  | 2900 | CA  | GLU | 30 | C | --- | 5301 | Mo4  | LIG | 0 | Z | 2.75 |
| 88.  | 2900 | CA  | GLU | 30 | C | --- | 5302 | Mo5  | LIG | 0 | Z | 3.55 |
| 89.  | 2900 | CA  | GLU | 30 | C | --- | 5319 | S14  | LIG | 0 | Z | 3.06 |
| 90.  | 2900 | CA  | GLU | 30 | C | --- | 5320 | S15  | LIG | 0 | Z | 2.05 |
| 91.  | 2901 | C   | GLU | 30 | C | --- | 5319 | S14  | LIG | 0 | Z | 3.50 |
| 92.  | 2901 | C   | GLU | 30 | C | --- | 5320 | S15  | LIG | 0 | Z | 2.76 |
| 93.  | 2902 | O   | GLU | 30 | C | --- | 5319 | S14  | LIG | 0 | Z | 3.14 |
| 94.  | 2902 | O   | GLU | 30 | C | --- | 5320 | S15  | LIG | 0 | Z | 3.40 |
| 95.  | 2903 | CB  | GLU | 30 | C | --- | 5301 | Mo4  | LIG | 0 | Z | 2.41 |
| 96.  | 2903 | CB  | GLU | 30 | C | --- | 5302 | Mo5  | LIG | 0 | Z | 2.29 |
| 97.  | 2903 | CB  | GLU | 30 | C | --- | 5311 | S6   | LIG | 0 | Z | 3.34 |
| 98.  | 2903 | CB  | GLU | 30 | C | --- | 5319 | S14  | LIG | 0 | Z | 3.36 |
| 99.  | 2903 | CB  | GLU | 30 | C | --- | 5320 | S15  | LIG | 0 | Z | 0.71 |
| 100. | 2903 | CB  | GLU | 30 | C | --- | 5321 | S16  | LIG | 0 | Z | 3.18 |
| 101. | 2903 | CB  | GLU | 30 | C | --- | 5388 | Mo55 | LIG | 0 | Z | 3.05 |
| 102. | 2903 | CB  | GLU | 30 | C | --- | 5494 | S99  | LIG | 0 | Z | 3.84 |
| 103. | 2903 | CB  | GLU | 30 | C | --- | 5494 | S99  | LIG | 0 | Z | 3.77 |
| 104. | 2904 | CG  | GLU | 30 | C | --- | 5301 | Mo4  | LIG | 0 | Z | 2.65 |
| 105. | 2904 | CG  | GLU | 30 | C | --- | 5302 | Mo5  | LIG | 0 | Z | 3.16 |
| 106. | 2904 | CG  | GLU | 30 | C | --- | 5311 | S6   | LIG | 0 | Z | 3.40 |

|      |      |     |     |    |   |     |      |      |     |   |   |      |
|------|------|-----|-----|----|---|-----|------|------|-----|---|---|------|
| 107. | 2904 | CG  | GLU | 30 | C | --- | 5319 | S14  | LIG | 0 | Z | 2.83 |
| 108. | 2904 | CG  | GLU | 30 | C | --- | 5320 | S15  | LIG | 0 | Z | 0.89 |
| 109. | 2904 | CG  | GLU | 30 | C | --- | 5321 | S16  | LIG | 0 | Z | 3.73 |
| 110. | 2904 | CG  | GLU | 30 | C | --- | 5379 | Mo46 | LIG | 0 | Z | 3.41 |
| 111. | 2904 | CG  | GLU | 30 | C | --- | 5388 | Mo55 | LIG | 0 | Z | 2.10 |
| 112. | 2904 | CG  | GLU | 30 | C | --- | 5494 | S99  | LIG | 0 | Z | 2.32 |
| 113. | 2904 | CG  | GLU | 30 | C | --- | 5494 | S99  | LIG | 0 | Z | 2.89 |
| 114. | 2905 | CD  | GLU | 30 | C | --- | 5301 | Mo4  | LIG | 0 | Z | 3.13 |
| 115. | 2905 | CD  | GLU | 30 | C | --- | 5302 | Mo5  | LIG | 0 | Z | 2.88 |
| 116. | 2905 | CD  | GLU | 30 | C | --- | 5311 | S6   | LIG | 0 | Z | 2.68 |
| 117. | 2905 | CD  | GLU | 30 | C | --- | 5319 | S14  | LIG | 0 | Z | 3.87 |
| 118. | 2905 | CD  | GLU | 30 | C | --- | 5320 | S15  | LIG | 0 | Z | 1.82 |
| 119. | 2905 | CD  | GLU | 30 | C | --- | 5321 | S16  | LIG | 0 | Z | 3.47 |
| 120. | 2905 | CD  | GLU | 30 | C | --- | 5379 | Mo46 | LIG | 0 | Z | 3.49 |
| 121. | 2905 | CD  | GLU | 30 | C | --- | 5388 | Mo55 | LIG | 0 | Z | 0.73 |
| 122. | 2905 | CD  | GLU | 30 | C | --- | 5389 | Mo56 | LIG | 0 | Z | 3.63 |
| 123. | 2905 | CD  | GLU | 30 | C | --- | 5397 | Mo64 | LIG | 0 | Z | 3.04 |
| 124. | 2905 | CD  | GLU | 30 | C | --- | 5398 | Mo65 | LIG | 0 | Z | 3.42 |
| 125. | 2905 | CD  | GLU | 30 | C | --- | 5469 | S74  | LIG | 0 | Z | 3.10 |
| 126. | 2905 | CD  | GLU | 30 | C | --- | 5478 | S83  | LIG | 0 | Z | 2.86 |
| 127. | 2905 | CD  | GLU | 30 | C | --- | 5494 | S99  | LIG | 0 | Z | 2.40 |
| 128. | 2905 | CD  | GLU | 30 | C | --- | 5494 | S99  | LIG | 0 | Z | 2.06 |
| 129. | 2906 | OE1 | GLU | 30 | C | --- | 5302 | Mo5  | LIG | 0 | Z | 2.49 |
| 130. | 2906 | OE1 | GLU | 30 | C | --- | 5311 | S6   | LIG | 0 | Z | 3.02 |
| 131. | 2906 | OE1 | GLU | 30 | C | --- | 5312 | S7   | LIG | 0 | Z | 3.15 |
| 132. | 2906 | OE1 | GLU | 30 | C | --- | 5320 | S15  | LIG | 0 | Z | 2.31 |

|      |      |     |     |    |   |     |      |      |     |   |   |      |
|------|------|-----|-----|----|---|-----|------|------|-----|---|---|------|
| 133. | 2906 | OE1 | GLU | 30 | C | --- | 5321 | S16  | LIG | 0 | Z | 2.47 |
| 134. | 2906 | OE1 | GLU | 30 | C | --- | 5388 | Mo55 | LIG | 0 | Z | 1.64 |
| 135. | 2906 | OE1 | GLU | 30 | C | --- | 5397 | Mo64 | LIG | 0 | Z | 1.85 |
| 136. | 2906 | OE1 | GLU | 30 | C | --- | 5398 | Mo65 | LIG | 0 | Z | 3.18 |
| 137. | 2906 | OE1 | GLU | 30 | C | --- | 5478 | S83  | LIG | 0 | Z | 2.52 |
| 138. | 2906 | OE1 | GLU | 30 | C | --- | 5494 | S99  | LIG | 0 | Z | 3.46 |
| 139. | 2906 | OE1 | GLU | 30 | C | --- | 5494 | S99  | LIG | 0 | Z | 1.60 |
| 140. | 2906 | OE1 | GLU | 30 | C | --- | 5494 | S99  | LIG | 0 | Z | 3.68 |
| 141. | 2907 | OE2 | GLU | 30 | C | --- | 5301 | Mo4  | LIG | 0 | Z | 3.27 |
| 142. | 2907 | OE2 | GLU | 30 | C | --- | 5302 | Mo5  | LIG | 0 | Z | 3.69 |
| 143. | 2907 | OE2 | GLU | 30 | C | --- | 5310 | S5   | LIG | 0 | Z | 3.73 |
| 144. | 2907 | OE2 | GLU | 30 | C | --- | 5311 | S6   | LIG | 0 | Z | 2.58 |
| 145. | 2907 | OE2 | GLU | 30 | C | --- | 5319 | S14  | LIG | 0 | Z | 3.89 |
| 146. | 2907 | OE2 | GLU | 30 | C | --- | 5320 | S15  | LIG | 0 | Z | 2.81 |
| 147. | 2907 | OE2 | GLU | 30 | C | --- | 5379 | Mo46 | LIG | 0 | Z | 2.75 |
| 148. | 2907 | OE2 | GLU | 30 | C | --- | 5388 | Mo55 | LIG | 0 | Z | 0.58 |
| 149. | 2907 | OE2 | GLU | 30 | C | --- | 5389 | Mo56 | LIG | 0 | Z | 2.73 |
| 150. | 2907 | OE2 | GLU | 30 | C | --- | 5397 | Mo64 | LIG | 0 | Z | 3.67 |
| 151. | 2907 | OE2 | GLU | 30 | C | --- | 5398 | Mo65 | LIG | 0 | Z | 3.22 |
| 152. | 2907 | OE2 | GLU | 30 | C | --- | 5469 | S74  | LIG | 0 | Z | 1.88 |
| 153. | 2907 | OE2 | GLU | 30 | C | --- | 5478 | S83  | LIG | 0 | Z | 2.55 |
| 154. | 2907 | OE2 | GLU | 30 | C | --- | 5479 | S84  | LIG | 0 | Z | 3.69 |
| 155. | 2907 | OE2 | GLU | 30 | C | --- | 5494 | S99  | LIG | 0 | Z | 2.18 |
| 156. | 2907 | OE2 | GLU | 30 | C | --- | 5494 | S99  | LIG | 0 | Z | 2.78 |
| 157. | 2907 | OE2 | GLU | 30 | C | --- | 5494 | S99  | LIG | 0 | Z | 3.85 |
| 158. | 2909 | N   | ARG | 31 | C | --- | 5320 | S15  | LIG | 0 | Z | 3.44 |

|      |      |     |     |    |   |     |      |     |     |   |   |      |
|------|------|-----|-----|----|---|-----|------|-----|-----|---|---|------|
| 159. | 2939 | CB  | PHE | 33 | C | --- | 5300 | Mo3 | LIG | 0 | Z | 3.76 |
| 160. | 2939 | CB  | PHE | 33 | C | --- | 5318 | S13 | LIG | 0 | Z | 3.17 |
| 161. | 2939 | CB  | PHE | 33 | C | --- | 5319 | S14 | LIG | 0 | Z | 3.52 |
| 162. | 2940 | CG  | PHE | 33 | C | --- | 5300 | Mo3 | LIG | 0 | Z | 3.86 |
| 163. | 2942 | CD2 | PHE | 33 | C | --- | 5300 | Mo3 | LIG | 0 | Z | 3.20 |
| 164. | 2942 | CD2 | PHE | 33 | C | --- | 5319 | S14 | LIG | 0 | Z | 3.73 |
| 165. | 2952 | CG  | LEU | 34 | C | --- | 5319 | S14 | LIG | 0 | Z | 3.78 |
| 166. | 2952 | CG  | LEU | 34 | C | --- | 5494 | S99 | LIG | 0 | Z | 3.24 |
| 167. | 2952 | CG  | LEU | 34 | C | --- | 5494 | S99 | LIG | 0 | Z | 3.28 |
| 168. | 2953 | CD1 | LEU | 34 | C | --- | 5494 | S99 | LIG | 0 | Z | 3.84 |
| 169. | 2953 | CD1 | LEU | 34 | C | --- | 5494 | S99 | LIG | 0 | Z | 2.72 |
| 170. | 2953 | CD1 | LEU | 34 | C | --- | 5494 | S99 | LIG | 0 | Z | 3.51 |
| 171. | 2953 | CD1 | LEU | 34 | C | --- | 5494 | S99 | LIG | 0 | Z | 3.89 |
| 172. | 2954 | CD2 | LEU | 34 | C | --- | 5494 | S99 | LIG | 0 | Z | 2.25 |
| 173. | 2954 | CD2 | LEU | 34 | C | --- | 5494 | S99 | LIG | 0 | Z | 3.78 |
| 174. | 2954 | CD2 | LEU | 34 | C | --- | 5494 | S99 | LIG | 0 | Z | 3.64 |
| 175. | 2954 | CD2 | LEU | 34 | C | --- | 5494 | S99 | LIG | 0 | Z | 3.51 |
| 176. | 3006 | CG  | LYS | 40 | C | --- | 5317 | S12 | LIG | 0 | Z | 3.49 |
| 177. | 3007 | CD  | LYS | 40 | C | --- | 5298 | Mo1 | LIG | 0 | Z | 3.55 |
| 178. | 3007 | CD  | LYS | 40 | C | --- | 5299 | Mo2 | LIG | 0 | Z | 3.26 |
| 179. | 3007 | CD  | LYS | 40 | C | --- | 5317 | S12 | LIG | 0 | Z | 2.05 |
| 180. | 3007 | CD  | LYS | 40 | C | --- | 5318 | S13 | LIG | 0 | Z | 3.52 |
| 181. | 3008 | CE  | LYS | 40 | C | --- | 5298 | Mo1 | LIG | 0 | Z | 3.70 |
| 182. | 3008 | CE  | LYS | 40 | C | --- | 5316 | S11 | LIG | 0 | Z | 3.23 |
| 183. | 3008 | CE  | LYS | 40 | C | --- | 5317 | S12 | LIG | 0 | Z | 2.32 |
| 184. | 3009 | NZ  | LYS | 40 | C | --- | 5298 | Mo1 | LIG | 0 | Z | 3.58 |

|      |      |     |     |    |   |     |      |      |     |   |   |      |
|------|------|-----|-----|----|---|-----|------|------|-----|---|---|------|
| 185. | 3009 | NZ  | LYS | 40 | C | --- | 5316 | S11  | LIG | 0 | Z | 2.85 |
| 186. | 3009 | NZ  | LYS | 40 | C | --- | 5317 | S12  | LIG | 0 | Z | 1.93 |
| 187. | 3009 | NZ  | LYS | 40 | C | --- | 5361 | Mo28 | LIG | 0 | Z | 3.45 |
| 188. | 3009 | NZ  | LYS | 40 | C | --- | 5494 | S99  | LIG | 0 | Z | 2.68 |
| 189. | 3009 | NZ  | LYS | 40 | C | --- | 5494 | S99  | LIG | 0 | Z | 3.60 |
| 190. | 3089 | N   | LEU | 48 | C | --- | 5309 | S4   | LIG | 0 | Z | 3.56 |
| 191. | 3090 | CA  | LEU | 48 | C | --- | 5299 | Mo2  | LIG | 0 | Z | 3.72 |
| 192. | 3090 | CA  | LEU | 48 | C | --- | 5300 | Mo3  | LIG | 0 | Z | 3.68 |
| 193. | 3090 | CA  | LEU | 48 | C | --- | 5309 | S4   | LIG | 0 | Z | 2.51 |
| 194. | 3091 | C   | LEU | 48 | C | --- | 5300 | Mo3  | LIG | 0 | Z | 3.37 |
| 195. | 3091 | C   | LEU | 48 | C | --- | 5309 | S4   | LIG | 0 | Z | 1.92 |
| 196. | 3091 | C   | LEU | 48 | C | --- | 5310 | S5   | LIG | 0 | Z | 3.01 |
| 197. | 3091 | C   | LEU | 48 | C | --- | 5460 | S65  | LIG | 0 | Z | 3.81 |
| 198. | 3092 | O   | LEU | 48 | C | --- | 5300 | Mo3  | LIG | 0 | Z | 2.42 |
| 199. | 3092 | O   | LEU | 48 | C | --- | 5309 | S4   | LIG | 0 | Z | 1.72 |
| 200. | 3092 | O   | LEU | 48 | C | --- | 5310 | S5   | LIG | 0 | Z | 1.85 |
| 201. | 3092 | O   | LEU | 48 | C | --- | 5370 | Mo37 | LIG | 0 | Z | 3.48 |
| 202. | 3092 | O   | LEU | 48 | C | --- | 5379 | Mo46 | LIG | 0 | Z | 3.54 |
| 203. | 3092 | O   | LEU | 48 | C | --- | 5460 | S65  | LIG | 0 | Z | 3.11 |
| 204. | 3093 | CB  | LEU | 48 | C | --- | 5299 | Mo2  | LIG | 0 | Z | 2.39 |
| 205. | 3093 | CB  | LEU | 48 | C | --- | 5300 | Mo3  | LIG | 0 | Z | 3.15 |
| 206. | 3093 | CB  | LEU | 48 | C | --- | 5308 | S3   | LIG | 0 | Z | 3.31 |
| 207. | 3093 | CB  | LEU | 48 | C | --- | 5309 | S4   | LIG | 0 | Z | 2.22 |
| 208. | 3094 | CG  | LEU | 48 | C | --- | 5299 | Mo2  | LIG | 0 | Z | 3.09 |
| 209. | 3094 | CG  | LEU | 48 | C | --- | 5309 | S4   | LIG | 0 | Z | 3.71 |
| 210. | 3095 | CD1 | LEU | 48 | C | --- | 5298 | Mo1  | LIG | 0 | Z | 3.75 |

|      |      |     |     |    |   |     |      |      |     |   |   |      |
|------|------|-----|-----|----|---|-----|------|------|-----|---|---|------|
| 211. | 3095 | CD1 | LEU | 48 | C | --- | 5299 | Mo2  | LIG | 0 | Z | 2.63 |
| 212. | 3095 | CD1 | LEU | 48 | C | --- | 5308 | S3   | LIG | 0 | Z | 3.85 |
| 213. | 3098 | N   | SER | 49 | C | --- | 5309 | S4   | LIG | 0 | Z | 2.82 |
| 214. | 3098 | N   | SER | 49 | C | --- | 5310 | S5   | LIG | 0 | Z | 3.83 |
| 215. | 3098 | N   | SER | 49 | C | --- | 5460 | S65  | LIG | 0 | Z | 3.89 |
| 216. | 3099 | CA  | SER | 49 | C | --- | 5309 | S4   | LIG | 0 | Z | 3.46 |
| 217. | 3099 | CA  | SER | 49 | C | --- | 5310 | S5   | LIG | 0 | Z | 3.73 |
| 218. | 3099 | CA  | SER | 49 | C | --- | 5460 | S65  | LIG | 0 | Z | 3.12 |
| 219. | 3100 | C   | SER | 49 | C | --- | 5310 | S5   | LIG | 0 | Z | 3.06 |
| 220. | 3100 | C   | SER | 49 | C | --- | 5460 | S65  | LIG | 0 | Z | 3.35 |
| 221. | 3100 | C   | SER | 49 | C | --- | 5469 | S74  | LIG | 0 | Z | 3.71 |
| 222. | 3101 | O   | SER | 49 | C | --- | 5310 | S5   | LIG | 0 | Z | 3.11 |
| 223. | 3106 | N   | HIS | 50 | C | --- | 5310 | S5   | LIG | 0 | Z | 3.25 |
| 224. | 3106 | N   | HIS | 50 | C | --- | 5379 | Mo46 | LIG | 0 | Z | 3.86 |
| 225. | 3106 | N   | HIS | 50 | C | --- | 5460 | S65  | LIG | 0 | Z | 2.96 |
| 226. | 3106 | N   | HIS | 50 | C | --- | 5469 | S74  | LIG | 0 | Z | 2.65 |
| 227. | 3107 | CA  | HIS | 50 | C | --- | 5310 | S5   | LIG | 0 | Z | 3.57 |
| 228. | 3107 | CA  | HIS | 50 | C | --- | 5311 | S6   | LIG | 0 | Z | 3.45 |
| 229. | 3107 | CA  | HIS | 50 | C | --- | 5469 | S74  | LIG | 0 | Z | 2.19 |
| 230. | 3107 | CA  | HIS | 50 | C | --- | 5478 | S83  | LIG | 0 | Z | 3.76 |
| 231. | 3108 | C   | HIS | 50 | C | --- | 5469 | S74  | LIG | 0 | Z | 3.63 |
| 232. | 3110 | CB  | HIS | 50 | C | --- | 5389 | Mo56 | LIG | 0 | Z | 3.47 |
| 233. | 3110 | CB  | HIS | 50 | C | --- | 5469 | S74  | LIG | 0 | Z | 2.05 |
| 234. | 3110 | CB  | HIS | 50 | C | --- | 5470 | S75  | LIG | 0 | Z | 3.35 |
| 235. | 3110 | CB  | HIS | 50 | C | --- | 5478 | S83  | LIG | 0 | Z | 3.24 |
| 236. | 3110 | CB  | HIS | 50 | C | --- | 5479 | S84  | LIG | 0 | Z | 2.71 |



|      |      |     |     |    |   |     |      |      |     |   |   |      |
|------|------|-----|-----|----|---|-----|------|------|-----|---|---|------|
| 237. | 3111 | CG  | HIS | 50 | C | --- | 5388 | Mo55 | LIG | 0 | Z | 3.68 |
| 238. | 3111 | CG  | HIS | 50 | C | --- | 5389 | Mo56 | LIG | 0 | Z | 3.84 |
| 239. | 3111 | CG  | HIS | 50 | C | --- | 5398 | Mo65 | LIG | 0 | Z | 3.41 |
| 240. | 3111 | CG  | HIS | 50 | C | --- | 5469 | S74  | LIG | 0 | Z | 2.77 |
| 241. | 3111 | CG  | HIS | 50 | C | --- | 5478 | S83  | LIG | 0 | Z | 2.14 |
| 242. | 3111 | CG  | HIS | 50 | C | --- | 5479 | S84  | LIG | 0 | Z | 2.40 |
| 243. | 3111 | CG  | HIS | 50 | C | --- | 5488 | S93  | LIG | 0 | Z | 3.59 |
| 244. | 3112 | ND1 | HIS | 50 | C | --- | 5311 | S6   | LIG | 0 | Z | 3.46 |
| 245. | 3112 | ND1 | HIS | 50 | C | --- | 5312 | S7   | LIG | 0 | Z | 3.85 |
| 246. | 3112 | ND1 | HIS | 50 | C | --- | 5388 | Mo55 | LIG | 0 | Z | 2.71 |
| 247. | 3112 | ND1 | HIS | 50 | C | --- | 5389 | Mo56 | LIG | 0 | Z | 3.68 |
| 248. | 3112 | ND1 | HIS | 50 | C | --- | 5397 | Mo64 | LIG | 0 | Z | 3.20 |
| 249. | 3112 | ND1 | HIS | 50 | C | --- | 5398 | Mo65 | LIG | 0 | Z | 2.49 |
| 250. | 3112 | ND1 | HIS | 50 | C | --- | 5469 | S74  | LIG | 0 | Z | 2.82 |
| 251. | 3112 | ND1 | HIS | 50 | C | --- | 5478 | S83  | LIG | 0 | Z | 0.80 |
| 252. | 3112 | ND1 | HIS | 50 | C | --- | 5479 | S84  | LIG | 0 | Z | 2.61 |
| 253. | 3112 | ND1 | HIS | 50 | C | --- | 5487 | S92  | LIG | 0 | Z | 3.70 |
| 254. | 3112 | ND1 | HIS | 50 | C | --- | 5488 | S93  | LIG | 0 | Z | 3.11 |
| 255. | 3112 | ND1 | HIS | 50 | C | --- | 5494 | S99  | LIG | 0 | Z | 3.65 |
| 256. | 3113 | CD2 | HIS | 50 | C | --- | 5478 | S83  | LIG | 0 | Z | 2.82 |
| 257. | 3113 | CD2 | HIS | 50 | C | --- | 5479 | S84  | LIG | 0 | Z | 3.02 |
| 258. | 3113 | CD2 | HIS | 50 | C | --- | 5488 | S93  | LIG | 0 | Z | 3.20 |
| 259. | 3114 | CE1 | HIS | 50 | C | --- | 5312 | S7   | LIG | 0 | Z | 3.58 |
| 260. | 3114 | CE1 | HIS | 50 | C | --- | 5388 | Mo55 | LIG | 0 | Z | 3.64 |
| 261. | 3114 | CE1 | HIS | 50 | C | --- | 5397 | Mo64 | LIG | 0 | Z | 2.80 |
| 262. | 3114 | CE1 | HIS | 50 | C | --- | 5398 | Mo65 | LIG | 0 | Z | 2.60 |

|      |      |     |     |     |   |     |      |      |     |   |   |      |
|------|------|-----|-----|-----|---|-----|------|------|-----|---|---|------|
| 263. | 3114 | CE1 | HIS | 50  | C | --- | 5407 | Mo74 | LIG | 0 | Z | 3.40 |
| 264. | 3114 | CE1 | HIS | 50  | C | --- | 5478 | S83  | LIG | 0 | Z | 1.24 |
| 265. | 3114 | CE1 | HIS | 50  | C | --- | 5479 | S84  | LIG | 0 | Z | 3.26 |
| 266. | 3114 | CE1 | HIS | 50  | C | --- | 5487 | S92  | LIG | 0 | Z | 2.52 |
| 267. | 3114 | CE1 | HIS | 50  | C | --- | 5488 | S93  | LIG | 0 | Z | 2.29 |
| 268. | 3114 | CE1 | HIS | 50  | C | --- | 5494 | S99  | LIG | 0 | Z | 3.89 |
| 269. | 3115 | NE2 | HIS | 50  | C | --- | 5398 | Mo65 | LIG | 0 | Z | 3.52 |
| 270. | 3115 | NE2 | HIS | 50  | C | --- | 5478 | S83  | LIG | 0 | Z | 2.43 |
| 271. | 3115 | NE2 | HIS | 50  | C | --- | 5479 | S84  | LIG | 0 | Z | 3.48 |
| 272. | 3115 | NE2 | HIS | 50  | C | --- | 5487 | S92  | LIG | 0 | Z | 3.08 |
| 273. | 3115 | NE2 | HIS | 50  | C | --- | 5488 | S93  | LIG | 0 | Z | 2.34 |
| 274. | 3118 | N   | GLY | 51  | C | --- | 5311 | S6   | LIG | 0 | Z | 3.48 |
| 275. | 3668 | CG  | HIS | 112 | C | --- | 5324 | S19  | LIG | 0 | Z | 3.18 |
| 276. | 3669 | ND1 | HIS | 112 | C | --- | 5305 | Mo8  | LIG | 0 | Z | 3.68 |
| 277. | 3669 | ND1 | HIS | 112 | C | --- | 5306 | Mo9  | LIG | 0 | Z | 3.75 |
| 278. | 3669 | ND1 | HIS | 112 | C | --- | 5323 | S18  | LIG | 0 | Z | 3.62 |
| 279. | 3669 | ND1 | HIS | 112 | C | --- | 5324 | S19  | LIG | 0 | Z | 1.87 |
| 280. | 3670 | CD2 | HIS | 112 | C | --- | 5323 | S18  | LIG | 0 | Z | 3.50 |
| 281. | 3670 | CD2 | HIS | 112 | C | --- | 5324 | S19  | LIG | 0 | Z | 3.68 |
| 282. | 3671 | CE1 | HIS | 112 | C | --- | 5305 | Mo8  | LIG | 0 | Z | 2.86 |
| 283. | 3671 | CE1 | HIS | 112 | C | --- | 5323 | S18  | LIG | 0 | Z | 2.31 |
| 284. | 3671 | CE1 | HIS | 112 | C | --- | 5324 | S19  | LIG | 0 | Z | 1.69 |
| 285. | 3671 | CE1 | HIS | 112 | C | --- | 5424 | Mo91 | LIG | 0 | Z | 3.60 |
| 286. | 3671 | CE1 | HIS | 112 | C | --- | 5494 | S99  | LIG | 0 | Z | 3.18 |
| 287. | 3672 | NE2 | HIS | 112 | C | --- | 5305 | Mo8  | LIG | 0 | Z | 3.46 |
| 288. | 3672 | NE2 | HIS | 112 | C | --- | 5323 | S18  | LIG | 0 | Z | 2.15 |

|      |      |     |     |     |   |     |      |      |     |   |   |      |
|------|------|-----|-----|-----|---|-----|------|------|-----|---|---|------|
| 289. | 3672 | NE2 | HIS | 112 | C | --- | 5324 | S19  | LIG | 0 | Z | 2.97 |
| 290. | 5044 | CB  | LYS | 120 | D | --- | 5494 | S99  | LIG | 0 | Z | 3.31 |
| 291. | 5047 | CE  | LYS | 120 | D | --- | 5426 | Mo93 | LIG | 0 | Z | 3.52 |
| 292. | 5081 | CG2 | THR | 123 | D | --- | 5494 | S99  | LIG | 0 | Z | 3.35 |
| 293. | 5088 | CB  | PRO | 124 | D | --- | 5494 | S99  | LIG | 0 | Z | 3.18 |
| 294. | 5089 | CG  | PRO | 124 | D | --- | 5321 | S16  | LIG | 0 | Z | 3.69 |
| 295. | 5089 | CG  | PRO | 124 | D | --- | 5494 | S99  | LIG | 0 | Z | 2.86 |
| 296. | 5089 | CG  | PRO | 124 | D | --- | 5494 | S99  | LIG | 0 | Z | 3.24 |
| 297. | 5090 | CD  | PRO | 124 | D | --- | 5494 | S99  | LIG | 0 | Z | 3.62 |
| 298. | 5090 | CD  | PRO | 124 | D | --- | 5494 | S99  | LIG | 0 | Z | 3.29 |
| 299. | 5090 | CD  | PRO | 124 | D | --- | 5494 | S99  | LIG | 0 | Z | 3.25 |
| 300. | 5096 | CG  | PRO | 125 | D | --- | 5494 | S99  | LIG | 0 | Z | 3.14 |
| 301. | 5096 | CG  | PRO | 125 | D | --- | 5494 | S99  | LIG | 0 | Z | 3.30 |
| 302. | 5096 | CG  | PRO | 125 | D | --- | 5494 | S99  | LIG | 0 | Z | 3.39 |
| 303. | 5097 | CD  | PRO | 125 | D | --- | 5494 | S99  | LIG | 0 | Z | 3.29 |
| 304. | 5097 | CD  | PRO | 125 | D | --- | 5494 | S99  | LIG | 0 | Z | 3.86 |
| 305. | 5097 | CD  | PRO | 125 | D | --- | 5494 | S99  | LIG | 0 | Z | 3.85 |

**Number of hydrogen bonds: 20**

**Number of non-bonded contacts: 305**
